# Supplementary material for: The Detailed Emissions Scaling, Isolation, and Diagnostic (DESID) module in the Community Multiscale Air Quality (CMAQ) modeling system version 5.3.2
Source: PubMed Central journal article supplement (PMC8318114; doi:10.5194/gmd-14-3407-2021), 2021-06-07
Supplement: NIHMS1712621-supplement-Supplement1.pdf [file NIHMS1712621-supplement-Supplement1.pdf]

Supplement of Geosci. Model Dev., 14, 3383–3406, 2021  
<https://doi.org/10.5194/gmd-14-3383-2021-supplement>  
© Author(s) 2021. CC BY 4.0 License.

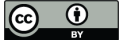

*Supplement of*

## **Regional CO<sub>2</sub> inversions with LUMIA, the Lund University Modular Inversion Algorithm, v1.0**

**Guillaume Monteil and Marko Scholze**

*Correspondence to:* Guillaume Monteil ([guillaume.monteil@nateko.lu.se](mailto:guillaume.monteil@nateko.lu.se))

The copyright of individual parts of the supplement might differ from the article licence.

**Contents:**

Section S1: Default Emission Control Interface for CMAQ v5.3.2 for chemical mechanism CB6r3\_ae7\_aq

Section S2: Emission Control Interface for implementation of Example 13 in Table 5.

5 Section S3: Emission Control Interface for implementation of all Examples in Table 7.

Section S4: CMAQ runs examples for a conventional (8 offline streams) application and a high-source-resolution (46 offline streams) application.

Table S1: Examples of streams used for conventional and high-source-resolution cases.

10 Figure S1: a) Average 1-hr NO<sub>2</sub> emissions input for June 3-10, 2016. b) Change in 1-hr NO<sub>2</sub> emissions for CMAQ run with ECI shown in section S2. c) Average NO<sub>2</sub> surface concentrations predicted by CMAQ for June 3-10, 2016. d) Change in average NO<sub>2</sub> concentration for ECI shown in section S2.

Figure S2: a) Average 1-hr TOL emissions input for June 3-10, 2016. b) Change in 1-hr TOL emissions for CMAQ run with ECI shown in section S3. c) Average TOL surface concentrations predicted by CMAQ for June 3-10, 2016. d) Change in average TOL concentration for ECI shown in section S3.

15 Figure S3: a) Average 1-hr NO emissions input for June 3-10, 2016. b) Change in 1-hr NO emissions for CMAQ run with ECI shown in section S3. c) Average NO surface concentrations predicted by CMAQ for June 3-10, 2016. d) Change in average NO concentration for ECI shown in section S3.

**S1: Default Emission Control Interface for CMAQ v5.3.2 for chemical mechanism CB6r3\_ae7\_aq**

```

20 !-----!
! EMISSION CONTROL INPUT FILE !
! FOR THE !
! COMMUNITY MULTISCALE AIR QUALITY (CMAQ) MODEL !
! DEVELOPED AND MAINTAINED BY THE !
25 ! NATIONAL EXPOSURE RESEARCH LABORATORY, OFFICE OF RESEARCH AND DEVELOPMENT !
! UNITED STATES ENVIRONMENTAL PROTECTION AGENCY !
! !
! THIS VERSION CONSISTENT WITH THE RELEASE OF CMAQv5.3.2 (FALL 2020) !
!-----!

30 !-----!
! Emissions Scaling Specification Section !
!-----!

&EmissionScalingRules
35 EM_NML=
! Region | Stream Label | Emission | CMAQ- | Phase/ | Scale | Basis | Op
! Label | | Variable | Species | Mode | Factor | |
!-----!

!> DEFAULT MAPPING <!
40 ! Note: Without default mapping for a species,
! there is no emission of that species.

! Default Gases
'EVERYWHERE', 'ALL' , 'NO2' , 'NO2' , 'GAS' ,1. , 'UNIT', 'a',
45 'EVERYWHERE', 'ALL' , 'NO' , 'NO' , 'GAS' ,1. , 'UNIT', 'a',
'EVERYWHERE', 'ALL' , 'HONO' , 'HONO' , 'GAS' ,1. , 'UNIT', 'a',
'EVERYWHERE', 'ALL' , 'SO2' , 'SO2' , 'GAS' ,1. , 'UNIT', 'a',
'EVERYWHERE', 'ALL' , 'NH3' , 'NH3' , 'GAS' ,1. , 'UNIT', 'a',
'EVERYWHERE', 'ALL' , 'AACD' , 'AACD' , 'GAS' ,1. , 'UNIT', 'a',
50 'EVERYWHERE', 'ALL' , 'ALD2' , 'ALD2' , 'GAS' ,1. , 'UNIT', 'a',
'EVERYWHERE', 'ALL' , 'FORM' , 'FORM' , 'GAS' ,1. , 'UNIT', 'a',
'EVERYWHERE', 'ALL' , 'MEOH' , 'MEOH' , 'GAS' ,1. , 'UNIT', 'a',
'EVERYWHERE', 'ALL' , 'FACD' , 'FACD' , 'GAS' ,1. , 'UNIT', 'a',
'EVERYWHERE', 'ALL' , 'CO' , 'CO' , 'GAS' ,1. , 'UNIT', 'a',
55 'EVERYWHERE', 'ALL' , 'ALDX' , 'ALDX' , 'GAS' ,1. , 'UNIT', 'a',
'EVERYWHERE', 'ALL' , 'ETHA' , 'ETHA' , 'GAS' ,1. , 'UNIT', 'a',
'EVERYWHERE', 'ALL' , 'ETOH' , 'ETOH' , 'GAS' ,1. , 'UNIT', 'a',
'EVERYWHERE', 'ALL' , 'KET' , 'KET' , 'GAS' ,1. , 'UNIT', 'a',
'EVERYWHERE', 'ALL' , 'PAR' , 'PAR' , 'GAS' ,1. , 'UNIT', 'a',
60 'EVERYWHERE', 'ALL' , 'ACET' , 'ACET' , 'GAS' ,1. , 'UNIT', 'a',
'EVERYWHERE', 'ALL' , 'PRPA' , 'PRPA' , 'GAS' ,1. , 'UNIT', 'a',
'EVERYWHERE', 'ALL' , 'ETHY' , 'ETHY' , 'GAS' ,1. , 'UNIT', 'a',
'EVERYWHERE', 'ALL' , 'ETH' , 'ETH' , 'GAS' ,1. , 'UNIT', 'a',
'EVERYWHERE', 'ALL' , 'OLE' , 'OLE' , 'GAS' ,1. , 'UNIT', 'a',
65 'EVERYWHERE', 'ALL' , 'IOLE' , 'IOLE' , 'GAS' ,1. , 'UNIT', 'a',
'EVERYWHERE', 'ALL' , 'ISOP' , 'ISOP' , 'GAS' ,1. , 'UNIT', 'a',

```

```

'EVERYWHERE', 'ALL'      , 'APIN'   , 'APIN'   , 'GAS' ,1. , 'UNIT', 'a',
'EVERYWHERE', 'ALL'      , 'TERP'   , 'TERP'   , 'GAS' ,1. , 'UNIT', 'a',
'EVERYWHERE', 'ALL'      , 'CH4'    , 'ECH4'   , 'GAS' ,1. , 'UNIT', 'a',
70 'EVERYWHERE', 'ALL'      , 'CL2'    , 'CL2'    , 'GAS' ,1. , 'UNIT', 'a',
'EVERYWHERE', 'ALL'      , 'HCL'    , 'HCL'    , 'GAS' ,1. , 'UNIT', 'a',
'EVERYWHERE', 'ALL'      , 'SESQ'   , 'SESQ'   , 'GAS' ,1. , 'UNIT', 'a',
'EVERYWHERE', 'ALL'      , 'SOAALK' , 'SOAALK' , 'GAS' ,1. , 'UNIT', 'a',
'EVERYWHERE', 'ALL'      , 'ACROLEIN', 'ACROLEIN', 'GAS' ,1. , 'UNIT', 'a',
75 'EVERYWHERE', 'ALL'      , 'ALD2_PRIMARY', 'ALD2_PRIMARY', 'GAS' ,1. , 'UNIT', 'a',
'EVERYWHERE', 'ALL'      , 'FORM_PRIMARY', 'FORM_PRIMARY', 'GAS' ,1. , 'UNIT', 'a',
'EVERYWHERE', 'ALL'      , 'ACROLEIN', 'ACRO_PRIMARY', 'GAS' ,1. , 'UNIT', 'a',
'EVERYWHERE', 'ALL'      , 'BUTADIENE13', 'BUTADIENE13', 'GAS' ,1. , 'UNIT', 'a',
'EVERYWHERE', 'ALL'      , 'SULF'   , 'SULF'   , 'GAS' ,0. , 'UNIT', 'a',
80 'EVERYWHERE', 'ALL'      , 'TOL'    , 'TOL'    , 'GAS' ,1. , 'UNIT', 'a',
'EVERYWHERE', 'ALL'      , 'XYLMN'  , 'XYLMN'  , 'GAS' ,1. , 'UNIT', 'a',
'EVERYWHERE', 'ALL'      , 'NAPH'   , 'NAPH'   , 'GAS' ,1. , 'UNIT', 'a',
'EVERYWHERE', 'ALL'      , 'BENZ'   , 'BENZENE', 'GAS' ,1. , 'UNIT', 'a',

85 ! Default Aerosols
'EVERYWHERE', 'ALL'      , 'SULF'   , 'ASO4'   , 'FINE' ,1. , 'MASS', 'a',
'EVERYWHERE', 'ALL'      , 'PSO4'   , 'ASO4'   , 'FINE' ,1. , 'UNIT', 'a',
'EVERYWHERE', 'ALL'      , 'PNH4'   , 'ANH4'   , 'FINE' ,1. , 'UNIT', 'a',
'EVERYWHERE', 'ALL'      , 'PNO3'   , 'ANO3'   , 'FINE' ,1. , 'UNIT', 'a',
90 'EVERYWHERE', 'ALL'      , 'PCL'    , 'ACL'    , 'FINE' ,1. , 'UNIT', 'a',
'EVERYWHERE', 'ALL'      , 'PNA'    , 'ANA'    , 'FINE' ,1. , 'UNIT', 'a',
'EVERYWHERE', 'ALL'      , 'PEC'    , 'AEC'    , 'FINE' ,1. , 'UNIT', 'a',
'EVERYWHERE', 'ALL'      , 'PMOTHR' , 'AOTHR'  , 'FINE' ,1. , 'UNIT', 'a',
'EVERYWHERE', 'ALL'      , 'PFE'    , 'AFE'    , 'FINE' ,1. , 'UNIT', 'a',
95 'EVERYWHERE', 'ALL'      , 'PAL'    , 'AAL'    , 'FINE' ,1. , 'UNIT', 'a',
'EVERYWHERE', 'ALL'      , 'PSI'    , 'ASI'    , 'FINE' ,1. , 'UNIT', 'a',
'EVERYWHERE', 'ALL'      , 'PTI'    , 'ATI'    , 'FINE' ,1. , 'UNIT', 'a',
'EVERYWHERE', 'ALL'      , 'PCA'    , 'ACA'    , 'FINE' ,1. , 'UNIT', 'a',
'EVERYWHERE', 'ALL'      , 'PMG'    , 'AMG'    , 'FINE' ,1. , 'UNIT', 'a',
100 'EVERYWHERE', 'ALL'      , 'PK'     , 'AK'     , 'FINE' ,1. , 'UNIT', 'a',
'EVERYWHERE', 'ALL'      , 'PMN'    , 'AMN'    , 'FINE' ,1. , 'UNIT', 'a',
'EVERYWHERE', 'ALL'      , 'PH20'   , 'AH20'   , 'FINE' ,1. , 'UNIT', 'a',

! Coarse-Mode Inorganic Ions Scaling
105 'EVERYWHERE', 'ALL'      , 'PMC'    , 'ACORS'  , 'COARSE',0.99675, 'UNIT', 'a',
'EVERYWHERE', 'ALL'      , 'PMC'    , 'ASO4'   , 'COARSE',0.001 , 'UNIT', 'a',
'EVERYWHERE', 'ALL'      , 'PMC'    , 'ANO3'   , 'COARSE',0.00048, 'UNIT', 'a',
'EVERYWHERE', 'ALL'      , 'PMC'    , 'ACL'    , 'COARSE',0.00145, 'UNIT', 'a',
'EVERYWHERE', 'ALL'      , 'PMC'    , 'AH20'   , 'COARSE',0.00032, 'UNIT', 'a',

110 ! Fine-Mode Primary Organic Aerosol Scaling
! There are a series of species available for propagating emissions of primary
! organic particles and vapor. APOC and APNCOM are nonvolatile species that
! age chemically in the particle phase. Traditionally, all POC (primary organic
115 ! carbon) and PNCOM (primary non-carbon organic matter) have been represented

```

```

!   by these species.
!   It is more correct to use semivolatile species to account for the gas-particle
!   partitioning of this POA mass. Several particle and gas-phase species are
!   provided for this task, and these species vary in their volatility, which is
120 !   quantified with the metric C*. See Donahue et al. (ES&T, 2006).
!   Gas Species :      VLVPO1  VSVPO1  VSVPO2  VSVPO3  VIVPO1
!   Particle Species : ALVPO1  ASVPO1  ASVPO2  ASVPO3  AIVPO1
!   C* (ug m-3) :      0.1    1      10     100    1000
!
!                   (Mostly Particle)                   (Mostly Vapor)
125 !   To enable semivolatile partitioning, you may direct a fraction of mass from the
!   nonvolatile emission variables (POC and PNCOM) to each of these semivolatile
!   CMAQ species. To conserve mass, the total of the scale factors should sum to 1.
!   Note: Each of the semivolatile species accounts for both OC and NCOM mass, so
!   rules should come in pairs (one for POC and one for PNCOM) in order to
130 !   conserve the total. For Example,
!
!       'EVERYWHERE', 'ALL' , 'POC'   , 'VSVPO2'   , 'GAS' , 0.14 , 'MASS', 'a',
!       'EVERYWHERE', 'ALL' , 'PNCOM', 'VSVPO2'   , 'GAS' , 0.14 , 'MASS', 'a',
!   Note: To avoid large swings in repartitioning after emission, it's a good idea
!   to split mass between gas and particle phases, with all mass going to
135 !   the particle in the C* = 0.1-1 range and all gas for C* = 100-1000.
!   Species with C*=10 can generally have mass split between gas and particle
!   or be put in all gas if conditions are very clean. If too much mass
!   evaporates or condenses upon emission, the aerosol size distribution
!   will be affected.
140 !   Note: It is common to specify different volatility distributions for different
!   emission sources. Please use this interface to specify your model
!   parameters.
!
! --> Nonvolatile POA
145 'EVERYWHERE', 'ALL'           , 'POC'      , 'APOC'      , 'FINE', 0.    , 'MASS', 'a',
!   'EVERYWHERE', 'ALL'           , 'PNCOM'    , 'APNCOM'    , 'FINE', 0.    , 'MASS', 'a',
! --> Semivolatile POA
!   'EVERYWHERE', 'ALL'           , 'POC'      , 'VLVPO1'    , 'GAS' , 0.    , 'MASS', 'a',
!   'EVERYWHERE', 'ALL'           , 'PNCOM'    , 'VLVPO1'    , 'GAS' , 0.    , 'MASS', 'a',
150 'EVERYWHERE', 'ALL'           , 'POC'      , 'VSVPO1'    , 'GAS' , 0.045, 'MASS', 'a',
!   'EVERYWHERE', 'ALL'           , 'PNCOM'    , 'VSVPO1'    , 'GAS' , 0.045, 'MASS', 'a',
!   'EVERYWHERE', 'ALL'           , 'POC'      , 'VSVPO2'    , 'GAS' , 0.14  , 'MASS', 'a',
!   'EVERYWHERE', 'ALL'           , 'PNCOM'    , 'VSVPO2'    , 'GAS' , 0.14  , 'MASS', 'a',
!   'EVERYWHERE', 'ALL'           , 'POC'      , 'VSVPO3'    , 'GAS' , 0.18  , 'MASS', 'a',
155 'EVERYWHERE', 'ALL'           , 'PNCOM'    , 'VSVPO3'    , 'GAS' , 0.18  , 'MASS', 'a',
!   'EVERYWHERE', 'ALL'           , 'POC'      , 'VIVPO1'    , 'GAS' , 0.50  , 'MASS', 'a',
!   'EVERYWHERE', 'ALL'           , 'PNCOM'    , 'VIVPO1'    , 'GAS' , 0.50  , 'MASS', 'a',
!   'EVERYWHERE', 'ALL'           , 'POC'      , 'ALVPO1'    , 'FINE' , 0.09  , 'MASS', 'a',
!   'EVERYWHERE', 'ALL'           , 'PNCOM'    , 'ALVPO1'    , 'FINE' , 0.09  , 'MASS', 'a',
160 'EVERYWHERE', 'ALL'           , 'POC'      , 'ASVPO1'    , 'FINE' , 0.045 , 'MASS', 'a',
!   'EVERYWHERE', 'ALL'           , 'PNCOM'    , 'ASVPO1'    , 'FINE' , 0.045 , 'MASS', 'a',
!   'EVERYWHERE', 'ALL'           , 'POC'      , 'ASVPO2'    , 'FINE' , 0.    , 'MASS', 'a',
!   'EVERYWHERE', 'ALL'           , 'PNCOM'    , 'ASVPO2'    , 'FINE' , 0.    , 'MASS', 'a',
!   'EVERYWHERE', 'ALL'           , 'POC'      , 'ASVPO3'    , 'FINE' , 0.    , 'MASS', 'a',

```

```

165  'EVERYWHERE', 'ALL'           , 'PNCOM'  , 'ASVPO3'   , 'FINE',0.   , 'MASS','a',
    'EVERYWHERE', 'ALL'           , 'POC'    , 'AIVPO1'   , 'FINE',0.   , 'MASS','a',
    'EVERYWHERE', 'ALL'           , 'PNCOM'  , 'AIVPO1'   , 'FINE',0.   , 'MASS','a',

! pcSOA is a CMAQ species introduced to account for missing pathways for SOA
170  ! formation from combustion sources. It includes IVOC oxidation as well as other
! phenomena (Murphy et al., ACP, 2017). It was parameterized primarily in LA,
! where vehicle exhaust continues to dominate.
    'EVERYWHERE', 'ALL'           , 'POC'    , 'PCVOC'    , 'GAS' ,6.579,'MASS','a',
    'EVERYWHERE', 'ALL'           , 'PNCOM'  , 'PCVOC'    , 'GAS' ,6.579,'MASS','a',
175  ! However, the added pcSOA is probably inappropriate for Fire sources, especially
! in its current configuration. This pathway should be zeroed out for all fire
! and wood-burning related sources.
    'EVERYWHERE', 'PT_FIRES'     , 'ALL'    , 'PCVOC'    , 'GAS' ,0.0 , 'MASS','o',
    'EVERYWHERE', 'PT_RXFIRES'   , 'ALL'    , 'PCVOC'    , 'GAS' ,0.0 , 'MASS','o',
180  'EVERYWHERE', 'PT_AGFIRES'   , 'ALL'    , 'PCVOC'    , 'GAS' ,0.0 , 'MASS','o',
    'EVERYWHERE', 'PT_OTHFIRES'  , 'ALL'    , 'PCVOC'    , 'GAS' ,0.0 , 'MASS','o',
    'EVERYWHERE', 'PT_FIRES_MXCA', 'ALL'    , 'PCVOC'    , 'GAS' ,0.0 , 'MASS','o',
    'EVERYWHERE', 'GR_RES_FIRES' , 'ALL'    , 'PCVOC'    , 'GAS' ,0.0 , 'MASS','o',

185  ! Wind-Blown Dust and Sea Spray Scaling
! Fine Components
    'EVERYWHERE', 'ALL'           , 'PMFINE_S04' , 'ASO4'     , 'FINE',1.   , 'UNIT','a',
    'EVERYWHERE', 'ALL'           , 'PMFINE_NO3' , 'ANO3'     , 'FINE',1.   , 'UNIT','a',
    'EVERYWHERE', 'ALL'           , 'PMFINE_CL'  , 'ACL'      , 'FINE',1.   , 'UNIT','a',
190  'EVERYWHERE', 'ALL'           , 'PMFINE_NH4' , 'ANH4'     , 'FINE',1.   , 'UNIT','a',
    'EVERYWHERE', 'ALL'           , 'PMFINE_NA'  , 'ANA'      , 'FINE',1.   , 'UNIT','a',
    'EVERYWHERE', 'ALL'           , 'PMFINE_CA'  , 'ACA'      , 'FINE',1.   , 'UNIT','a',
    'EVERYWHERE', 'ALL'           , 'PMFINE_MG'  , 'AMG'      , 'FINE',1.   , 'UNIT','a',
    'EVERYWHERE', 'ALL'           , 'PMFINE_K'   , 'AK'       , 'FINE',1.   , 'UNIT','a',
195  'EVERYWHERE', 'ALL'           , 'PMFINE_FE'  , 'AFE'      , 'FINE',1.   , 'UNIT','a',
    'EVERYWHERE', 'ALL'           , 'PMFINE_AL'  , 'AAL'      , 'FINE',1.   , 'UNIT','a',
    'EVERYWHERE', 'ALL'           , 'PMFINE_SI'  , 'ASI'      , 'FINE',1.   , 'UNIT','a',
    'EVERYWHERE', 'ALL'           , 'PMFINE_TI'  , 'ATI'      , 'FINE',1.   , 'UNIT','a',
    'EVERYWHERE', 'ALL'           , 'PMFINE_MN'  , 'AMN'      , 'FINE',1.   , 'UNIT','a',
200  'EVERYWHERE', 'ALL'           , 'PMFINE_H2O' , 'AH2O'     , 'FINE',1.   , 'UNIT','a',
    'EVERYWHERE', 'ALL'           , 'PMFINE_OTHR', 'AOTHR'    , 'FINE',1.   , 'UNIT','a',

! :Scaling of Fine-Mode POA from Wind-Blown Dust or Sea Spray. Either the
! :Nonvolatile POA should be propagated to the transport model, or the Low
205  ! :Volatility POA should be propagated, not both.
! : --> Nonvolatile POA
    ! 'EVERYWHERE', 'ALL'           , 'PMFINE_POC' , 'APOC'     , 'FINE',1.   , 'UNIT','a',
    ! 'EVERYWHERE', 'ALL'           , 'PMFINE_PNCOM', 'APNCOM'   , 'FINE',1.   , 'UNIT','a',
! : --> Semivolatile POA
210  'EVERYWHERE', 'ALL'           , 'PMFINE_LVPO1', 'ALVPO1'   , 'FINE',1.   , 'UNIT','a',
    'EVERYWHERE', 'ALL'           , 'PMFINE_LV001', 'ALV001'   , 'FINE',1.   , 'UNIT','a',

! Wind-Blown Dust and Sea Spray Scaling

```

```

! Coarse Components
215 'EVERYWHERE', 'ALL'      , 'PMCOARSE_S04', 'ASO4'      , 'COARSE',1.    , 'UNIT','a',
    'EVERYWHERE', 'ALL'      , 'PMCOARSE_NO3', 'ANO3'      , 'COARSE',1.    , 'UNIT','a',
    'EVERYWHERE', 'ALL'      , 'PMCOARSE_CL'  , 'ACL'       , 'COARSE',1.    , 'UNIT','a',
    'EVERYWHERE', 'ALL'      , 'PMCOARSE_H2O', 'AH20'      , 'COARSE',1.    , 'UNIT','a',
    'EVERYWHERE', 'ALL'      , 'PMCOARSE_SOIL', 'ASOIL'     , 'COARSE',1.    , 'UNIT','a',
220 'EVERYWHERE', 'ALL' , 'PMCOARSE_SEACAT', 'ASEACAT'   , 'COARSE',1.    , 'UNIT','a',
/

!-----!
! Size Distribution Specification Section                                     !
225 ! Each size distribution rule either modifies the parameters associated with !
! the aerosol modes of a particular stream, or adds new modes to a particular!
! stream if they do not already exist.                                     !
!-----!

230 &SizeDistributions
    SD_NML =
    !      | Stream Label   | Surr. Mode   | Ref. Mode
!<Default> 'ALL'           , 'FINE'      , 'FINE_REF',
!<Default> 'ALL'           , 'COARSE'    , 'COARSE_REF',
235      'WBDUST'      , 'FINE'      , 'FINE_WBDUST',
      'WBDUST'      , 'COARSE'    , 'COARSE_WBDUST',
      'SEASPRAY'     , 'FINE'      , 'FINE_SEASPRAY',
      'SEASPRAY'     , 'COARSE'    , 'COARSE_SEASPRAY',
!<Example> 'AIRCRAFT'     , 'FINE'      , 'AIR_FINE',   !To use these examples, you
240 !<Example> 'AIRCRAFT'     , 'COARSE'    , 'AIR_COARSE', ! must add entries for AIR_FINE
                                           ! and AIR_COARSE to the data
structure
                                           ! em_aero_ref in AERO_DATA.

245 /

!-----!
! Region-Based Scaling Specification Section                               !
! It is possible in CMAQ to scale emissions for a subset of the model domain !
250 ! using gridded masks to indicate where the scaling should occur. These masks!
! should be of type real and provided as variables on a file with format     !
! consistent with IO-API. Any number of files and variables may be used to  !
! specify 1 or more "regions" to be used in CMAQ. This section of the name- !
! list provides users with an interface to name these regions and identify  !
255 ! the stream data for each.
!-----!

&RegionsRegistry
RGN_NML =
260 !      | Region Label   | File_Label   | Variable on File
!<Default> 'EVERYWHERE' , 'N/A'       , 'N/A',
!<Example> 'WATER'     , 'CMAQ_MASKS', 'OPEN',

```

```
!<Example> 'ALL'          , 'CMAQ_MASKS' , 'ALL',
!<Example> 'ALL'          , 'ISAM_REGIONS', 'ALL',
265 /
```

```
!-----!
! Emissions Scaling Family Definitions                                     !
!   This section includes definitions for families of CMAQ chemical species, !
270 !   emission streams and region combinations. Please see the Emissions   !
!   Scaling Specification Section for a definitions of CMAQ species, Regions, !
!   and Streams. For each type of family, please indicate the number of    !
!   families you are prescribing (e.g. NChemFamilies=1). Then for each Family !
!   indicate the Name, the number of components, and the name of each      !
275 !   component. All entries are case-insensitive. See the Emissions tutorial !
!   in the CMAQ Repository for detailed directions for how to work with    !
!   Families.                                                               !
!-----!
```

```
280 !&ChemicalFamilies
! NChemFamilies      = 1
! ChemFamilyName(1)  = 'NOX'
! ChemFamilyNum(1)   = 2
! ChemFamilyMembers(1,:)= 'NO','NO2'
285 !/
```

```
!&StreamFamilies
! NStreamFamilies    = 1
! StreamFamilyName(1) = 'PT_SOURCES'
290 ! StreamFamilyNum(1) = 3
! StreamFamilyMembers(1,:)= 'PT_NONEGU','PT_EGU','PT_OTHER'
!/
```

```
!&RegionFamilies
295 ! NRegionFamilies    = 1
! RegionFamilyName(1) = 'Water'
! RegionFamilyNum(1)  = 2
! RegionFamilyMembers(1,:)= 'SURF','OPEN'
!/
300
```



## S2: Emission Control Interface for implementation of Example 13 in Table 5.

Two lines (one comment and one rule) are added to the default ECI. Three lines above and below are repeated from the default ECI in this example to illustrate the location of the added lines.

```
305 ... 'EVERYWHERE', 'ALL'           , 'XYLMN' , 'XYLMN'           , 'GAS' ,1. , 'UNIT', 'a',  
      'EVERYWHERE', 'ALL'           , 'NAPH'  , 'NAPH'            , 'GAS' ,1. , 'UNIT', 'a',  
      'EVERYWHERE', 'ALL'           , 'BENZ'  , 'BENZENE'        , 'GAS' ,1. , 'UNIT', 'a',  
  
      ! Scaling Modification from Table 5 (Example 13)  
310 'IL',           'ALL'           , 'NO2', 'NO2'            , 'GAS' ,1.1 , 'UNIT', 'o',  
  
      ! Default Aerosols  
      'EVERYWHERE', 'ALL'           , 'SULF'  , 'ASO4'           , 'FINE' ,1. , 'MASS', 'a',  
      'EVERYWHERE', 'ALL'           , 'PSO4'  , 'ASO4'           , 'FINE' ,1. , 'UNIT', 'a',  
315 ...
```

### S3: Emission Control Interface for implementation of all Examples in Table 7.

Seven rules and two comments are added to the rule section of the default ECI. Three lines are repeated below from the default ECI rule section to illustrate the location of the added rules. Region and family specifications appear after in their corresponding sections.

```
320 ...
    'EVERYWHERE', 'ALL'           , 'ACROLEIN', 'ACRO_PRIMARY', 'GAS' ,1. , 'UNIT', 'a',
    'EVERYWHERE', 'ALL'           , 'BUTADIENE13', 'BUTADIENE13' , 'GAS' ,1. , 'UNIT', 'a',
    'EVERYWHERE', 'ALL'           , 'SULF'      , 'SULF'      , 'GAS' ,0. , 'UNIT', 'a',
325
    ! Mapping Rules from Table 7 (Examples 15-18)
    'EVERYWHERE', 'ALL'           , 'TOL'      , 'TOL'      , 'GAS' ,1. , 'UNIT', 'a',
    'EVERYWHERE', 'ALL'           , 'XYLMN'    , 'XYLMN'    , 'GAS' ,1. , 'UNIT', 'a',
    'EVERYWHERE', 'ALL'           , 'NAPH'     , 'NAPH'     , 'GAS' ,1. , 'UNIT', 'a',
330 'EVERYWHERE', 'ALL'           , 'BENZ'     , 'BENZENE'  , 'GAS' ,1. , 'UNIT', 'a',

    ! Scaling Modifications from Table 7 (Examples 19-21)
    'EVERYWHERE', 'ALL'           , 'ALL'      , 'AROMATICS' , 'GAS' ,0.6 , 'UNIT', 'm',
    'SOUTHWEST', 'ALL'           , 'NO'       , 'NO'       , 'GAS' ,0.9 , 'UNIT', 'o',
335 'EVERYWHERE', 'INDUS'        , 'ALL'      , 'AROMATICS' , 'GAS' ,0.3 , 'UNIT', 'o',

    ! Default Aerosols
    'EVERYWHERE', 'ALL'           , 'SULF'     , 'ASO4'     , 'FINE' ,1. , 'MASS', 'a',
    'EVERYWHERE', 'ALL'           , 'PSO4'     , 'ASO4'     , 'FINE' ,1. , 'UNIT', 'a',
340 ...

!-----!
! Region-Based Scaling Specification Section !
! It is possible in CMAQ to scale emissions for a subset of the model domain !
345 ! using gridded masks to indicate where the scaling should occur. These masks!
! should be of type real and provided as variables on a file with format !
! consistent with IO-API. Any number of files and variables may be used to !
! specify 1 or more "regions" to be used in CMAQ. This section of the name- !
! list provides users with an interface to name these regions and identify !
350 ! the stream data for each.
!-----!

&RegionsRegistry
  RGN_NML =
355 !           | Region Label   | File_Label | Variable on File
           'ALL'           , 'US_STATES' , 'ALL',
/

360 !-----!
! Emissions Scaling Family Definitions !
! This section includes definitions for families of CMAQ chemical species, !
! emission streams and region combinations. Please see the Emissions !
! Scaling Specification Section for a definitions of CMAQ species, Regions, !
365 ! and Streams. For each type of family, please indicate the number of !
```

```
! families you are prescribing (e.g. NChemFamilies=1). Then for each Family !
! indicate the Name, the number of components, and the name of each !
! component. All entries are case-insensitive. See the Emissions tutorial !
! in the CMAQ Repository for detailed directions for how to work with !
370 ! Families. !
!-----!
```

```
&ChemicalFamilies
```

```
375 NChemFamilies = 1
ChemFamilyName(1) = 'AROMATICICS'
ChemFamilyNum(1) = 4
ChemFamilyMembers(1,:)= 'TOL','XYLMN','BENZENE','NAPH'
/
```

```
380 &StreamFamilies
```

```
NStreamFamilies = 1
StreamFamilyName(1) = 'INDUS'
StreamFamilyNum(1) = 3
StreamFamilyMembers(1,:)= 'POINT_NONEGU','POINT_EGU','POINT_OTHER'
385 /
```

```
&RegionFamilies
```

```
390 NRegionFamilies = 1
RegionFamilyName(1) = 'SOUTHWEST'
RegionFamilyNum(1) = 5
RegionFamilyMembers(1,:)= 'CA','NM','AZ','NV','UT'
/
```

395 **S4. CMAQ runscript examples for a conventional (10 offline streams) application and a high-source-resolution (46 offline streams) application.**

Relevant portion of conventional CMAQ runscript specification with 2 offline gridded and 8 offline point streams

```
#> Emissions Control File
400 setenv EMISSCTRL_NML EmissCtrl_cb6r3_ae7_aq.nml

#> Spatial Masks For Emissions Scaling
setenv CMAQ_MASKS 12US1_states.nc #> horizontal grid-dependent geographic masks for states

405 #> Set default for symbolic date override
setenv EMIS_SYM_DATE F

#> Gridded Emissions Files
setenv N_EMIS_GR 2

410 # Emission Rates for Gridded Sources
setenv GR_EMIS_001 ${EMISpath}/emis_mole_all_20160101_cb6_bench.nc
setenv GR_EMIS_002 ${EMISpath2}/emis_mole_rwc_20160101_12US1_cmaq_cb6_2016ff_16j.nc

415 # Label Each Gridded Emission Stream
setenv GR_EMIS_LAB_001 GRIDDED_EMIS
setenv GR_EMIS_LAB_002 GR_RES_FIRES

# Enforce error if Gridded Emission File Date does not Match Model Date
420 setenv GR_EM_SYM_DATE_001 F # To change default behaviour please see Users Guide for EMIS_SYM_DATE
setenv GR_EM_SYM_DATE_002 F # To change default behaviour please see Users Guide for EMIS_SYM_DATE

#> Offline point emissions configuration
setenv N_EMIS_PT 8 #> Number of elevated source groups

425 # Time-Independent Stack Parameters for Offline Point Sources
setenv STK_GRPS_001 $IN_PTpath/stack_groups/stack_groups_ptnonipm.nc
setenv STK_GRPS_002 $IN_PTpath/stack_groups/stack_groups_ptegu.nc
setenv STK_GRPS_003 $IN_PTpath/stack_groups/stack_groups_othpt.nc
430 setenv STK_GRPS_004 $IN_PTpath/stack_groups/stack_groups_ptagfire_20160101.nc
setenv STK_GRPS_005 $IN_PTpath/stack_groups/stack_groups_ptfire_20160101.nc
setenv STK_GRPS_006 $IN_PTpath/stack_groups/stack_groups_ptfire_othna_20160101.nc
setenv STK_GRPS_007 $IN_PTpath/stack_groups/stack_groups_pt_oilgas.nc
setenv STK_GRPS_008 $IN_PTpath/stack_groups/stack_groups_cmv_c3.nc

435 # Emission Rates for Offline Point Sources
setenv STK_EMIS_001 $IN_PTpath/ptnonipm/inln_mole_ptnonipm_20160101.nc
setenv STK_EMIS_002 $IN_PTpath/ptegu/inln_mole_ptegu_20160101.nc
setenv STK_EMIS_003 $IN_PTpath/othpt/inln_mole_othpt_20160101.nc
440 setenv STK_EMIS_004 $IN_PTpath/ptagfire/inln_mole_ptagfire_20160101.nc
setenv STK_EMIS_005 $IN_PTpath/ptfire/inln_mole_ptfire_20160101.nc
setenv STK_EMIS_006 $IN_PTpath/ptfire_othna/inln_mole_ptfire_othna_20160101.nc
```

```
setenv STK_EMIS_007 $IN_PTpath/pt_oilgas/inln_mole_pt_oilgas_20160101.nc
setenv STK_EMIS_008 $IN_PTpath/cmv_c3/inln_mole_cmv_c3_20160101.nc
445 # Label Each Offline Point Emissions Stream
setenv STK_EMIS_LAB_001 PT_NONEGU
setenv STK_EMIS_LAB_002 PT_EGU
setenv STK_EMIS_LAB_003 PT_OTHER
450 setenv STK_EMIS_LAB_004 PT_AGFIRE
setenv STK_EMIS_LAB_005 PT_FIRES
setenv STK_EMIS_LAB_006 PT_OTHFIRE
setenv STK_EMIS_LAB_007 PT_OILGAS
setenv STK_EMIS_LAB_008 PT_CMV
455 # Allow CMAQ to Use Point Source files with dates that do not match the internal model date
# To change default behaviour please see Users Guide for EMIS_SYM_DATE
setenv STK_EM_SYM_DATE_001 T
setenv STK_EM_SYM_DATE_002 T
460 setenv STK_EM_SYM_DATE_003 T
setenv STK_EM_SYM_DATE_004 T
setenv STK_EM_SYM_DATE_005 T
setenv STK_EM_SYM_DATE_006 T
setenv STK_EM_SYM_DATE_007 T
465 setenv STK_EM_SYM_DATE_008 T
```

## Relevant portion of High-source-resolution CMAQ runscript specification with 27 offline gridded and 19

### offline point streams

```
#> Emissions Control File
470 setenv EMISSCTRL_NML EmissCtrl_cb6r3_ae7_aq.nml

#> Spatial Masks For Emissions Scaling
setenv CMAQ_MASKS 12US1_states.nc #> horizontal grid-dependent geographic masks for states

#> Set default for symbolic date override
475 #> No need for stream-specific symbolic date overrides below
setenv EMIS_SYM_DATE T

#> Gridded Emissions Files
480 setenv N_EMIS_GR 27

# Emission Rates for Gridded Sources
setenv GR_EMIS_001 ${GR_EMISpath}/agfire/emis_mole_agfire_20160101_12US1.ncf
setenv GR_EMIS_002 ${GR_EMISpath}/agriculture/emis_mole_agriculture_20160101_12US1.ncf
setenv GR_EMIS_003 ${GR_EMISpath}/aircraft/emis_mole_aircraft_20160101_12US1.ncf
485 setenv GR_EMIS_004 ${GR_EMISpath}/cooking/emis_mole_cooking_20160101_12US1.ncf
setenv GR_EMIS_005 ${GR_EMISpath}/dust/emis_mole_dust_20160101_12US1.ncf
setenv GR_EMIS_006 ${GR_EMISpath}/egu_biomass/emis_mole_egu_biomass_20160101_12US1.ncf
setenv GR_EMIS_007 ${GR_EMISpath}/egu_coal/emis_mole_egu_coal_20160101_12US1.ncf
setenv GR_EMIS_008 ${GR_EMISpath}/egu_natgas/emis_mole_egu_natgas_20160101_12US1.ncf
490 setenv GR_EMIS_009 ${GR_EMISpath}/egu_oil/emis_mole_egu_oil_20160101_12US1.ncf
setenv GR_EMIS_010 ${GR_EMISpath}/indus_biomass/emis_mole_indus_biomass_20160101_12US1.ncf
setenv GR_EMIS_011 ${GR_EMISpath}/indus_coal/emis_mole_indus_coal_20160101_12US1.ncf
setenv GR_EMIS_012 ${GR_EMISpath}/indus_gasoline/emis_mole_indus_gasoline_20160101_12US1.ncf
setenv GR_EMIS_013 ${GR_EMISpath}/indus_natgas/emis_mole_indus_natgas_20160101_12US1.ncf
495 setenv GR_EMIS_014 ${GR_EMISpath}/indus_oil/emis_mole_indus_oil_20160101_12US1.ncf
setenv GR_EMIS_015 ${GR_EMISpath}/indus_wood/emis_mole_indus_wood_20160101_12US1.ncf
setenv GR_EMIS_016 ${GR_EMISpath}/marine/emis_mole_marine_20160101_12US1.ncf
setenv GR_EMIS_017 ${GR_EMISpath}/nonroad_diesel/emis_mole_nonroad_diesel_20160101_12US1.ncf
setenv GR_EMIS_018 ${GR_EMISpath}/nonroad_gas/emis_mole_nonroad_gas_20160101_12US1.ncf
500 setenv GR_EMIS_019 ${GR_EMISpath}/onroad_diesel/emis_mole_onroad_diesel_20160101_12US1.ncf
setenv GR_EMIS_020 ${GR_EMISpath}/onroad_gas/emis_mole_onroad_gas_20160101_12US1.ncf
setenv GR_EMIS_021 ${GR_EMISpath}/other/emis_mole_other_20160101_12US1.ncf
setenv GR_EMIS_022 ${GR_EMISpath}/rail/emis_mole_rail_20160101_12US1.ncf
setenv GR_EMIS_023 ${GR_EMISpath}/res_diesel/emis_mole_res_diesel_20160101_12US1.ncf
505 setenv GR_EMIS_024 ${GR_EMISpath}/res_openfire/emis_mole_res_openfire_20160101_12US1.ncf
setenv GR_EMIS_025 ${GR_EMISpath}/res_wood/emis_mole_res_wood_20160101_12US1.ncf
setenv GR_EMIS_026 ${GR_EMISpath}/rxfire/emis_mole_rxfire_20160101_12US1.ncf
setenv GR_EMIS_027 ${GR_EMISpath}/wildfire/emis_mole_wildfire_20160101_12US1.ncf

510 # Label Each Gridded Emission Stream
setenv GR_EMIS_LAB_001 GR_AGFIRE
setenv GR_EMIS_LAB_002 GR_AGRICULTURE
setenv GR_EMIS_LAB_003 GR_AIRCRAFT
setenv GR_EMIS_LAB_004 GR_COOKING
```

```

515 setenv GR_EMIS_LAB_005 GR_DUST
setenv GR_EMIS_LAB_006 GR_EGU_BIOMASS
setenv GR_EMIS_LAB_007 GR_EGU_COAL
setenv GR_EMIS_LAB_008 GR_EGU_NATGAS
setenv GR_EMIS_LAB_009 GR_EGU_OIL
520 setenv GR_EMIS_LAB_010 GR_INDUS_BIOMASS
setenv GR_EMIS_LAB_011 GR_INDUS_COAL
setenv GR_EMIS_LAB_012 GR_INDUS_GASOLINE
setenv GR_EMIS_LAB_013 GR_INDUS_NATGAS
setenv GR_EMIS_LAB_014 GR_INDUS_OIL
525 setenv GR_EMIS_LAB_015 GR_INDUS_WOOD
setenv GR_EMIS_LAB_016 GR_MARINE
setenv GR_EMIS_LAB_017 GR_NONROAD_DIESEL
setenv GR_EMIS_LAB_018 GR_NONROAD_GAS
setenv GR_EMIS_LAB_019 GR_ONROAD_DIESEL
530 setenv GR_EMIS_LAB_020 GR_ONROAD_GAS
setenv GR_EMIS_LAB_021 GR_OTHER
setenv GR_EMIS_LAB_022 GR_RAIL
setenv GR_EMIS_LAB_023 GR_RES_DIESEL
setenv GR_EMIS_LAB_024 GR_RES_OPENFIRE
535 setenv GR_EMIS_LAB_025 GR_RES_WOOD
setenv GR_EMIS_LAB_026 GR_RXFIRE
setenv GR_EMIS_LAB_027 GR_WILDFIRE

#> Offline Point Emissions Files
540 setenv N_EMIS_PT 19      #> Number of elevated source groups

# Time-Independent Stack Parameters for Inline Point Sources
setenv STK_GRPS_001 $ST_EMISpath/aircraft/stack_groups_aircraft.ncf
setenv STK_GRPS_002 $ST_EMISpath/dust/stack_groups_dust.ncf
545 setenv STK_GRPS_003 $ST_EMISpath/egu_biomass/stack_groups_egu_biomass.ncf
setenv STK_GRPS_004 $ST_EMISpath/egu_coal/stack_groups_egu_coal.ncf
setenv STK_GRPS_005 $ST_EMISpath/egu_natgas/stack_groups_egu_natgas.ncf
setenv STK_GRPS_006 $ST_EMISpath/egu_oil/stack_groups_egu_oil.ncf
setenv STK_GRPS_007 $ST_EMISpath/indus_biomass/stack_groups_indus_biomass.ncf
550 setenv STK_GRPS_008 $ST_EMISpath/indus_coal/stack_groups_indus_coal.ncf
setenv STK_GRPS_009 $ST_EMISpath/indus_gasoline/stack_groups_indus_gasoline.ncf
setenv STK_GRPS_010 $ST_EMISpath/indus_natgas/stack_groups_indus_natgas.ncf
setenv STK_GRPS_011 $ST_EMISpath/indus_oil/stack_groups_indus_oil.ncf
setenv STK_GRPS_012 $ST_EMISpath/indus_wood/stack_groups_indus_wood.ncf
555 setenv STK_GRPS_013 $ST_EMISpath/marine/stack_groups_marine.ncf
setenv STK_GRPS_014 $ST_EMISpath/nonroad_diesel/stack_groups_nonroad_diesel.ncf
setenv STK_GRPS_015 $ST_EMISpath/nonroad_gas/stack_groups_nonroad_gas.ncf
setenv STK_GRPS_016 $ST_EMISpath/other/stack_groups_other.ncf
setenv STK_GRPS_017 $ST_EMISpath/rail/stack_groups_rail.ncf
560 setenv STK_GRPS_018 $ST_EMISpath/rxfire/stack_groups_rxfire_20160101.ncf
setenv STK_GRPS_019 $ST_EMISpath/wildfire/stack_groups_wildfire_20160101.ncf

# Emission Rates for Offline Point Sources
setenv STK_EMIS_001 $EP_EMISpath/aircraft/inln_mole_aircraft_20160101.ncf

```

565 setenv STK\_EMIS\_002 \$SEP\_EMISpath/dust/inln\_mole\_dust\_20160101.ncf  
setenv STK\_EMIS\_003 \$SEP\_EMISpath/egu\_biomass/inln\_mole\_egu\_biomass\_20160101.ncf  
setenv STK\_EMIS\_004 \$SEP\_EMISpath/egu\_coal/inln\_mole\_egu\_coal\_20160101.ncf  
setenv STK\_EMIS\_005 \$SEP\_EMISpath/egu\_natgas/inln\_mole\_egu\_natgas\_20160101.ncf  
setenv STK\_EMIS\_006 \$SEP\_EMISpath/egu\_oil/inln\_mole\_egu\_oil\_20160101.ncf  
570 setenv STK\_EMIS\_007 \$SEP\_EMISpath/indus\_biomass/inln\_mole\_indus\_biomass\_20160101.ncf  
setenv STK\_EMIS\_008 \$SEP\_EMISpath/indus\_coal/inln\_mole\_indus\_coal\_20160101.ncf  
setenv STK\_EMIS\_009 \$SEP\_EMISpath/indus\_gasoline/inln\_mole\_indus\_gasoline\_20160101.ncf  
setenv STK\_EMIS\_010 \$SEP\_EMISpath/indus\_natgas/inln\_mole\_indus\_natgas\_20160101.ncf  
setenv STK\_EMIS\_011 \$SEP\_EMISpath/indus\_oil/inln\_mole\_indus\_oil\_20160101.ncf  
575 setenv STK\_EMIS\_012 \$SEP\_EMISpath/indus\_wood/inln\_mole\_indus\_wood\_20160101.ncf  
setenv STK\_EMIS\_013 \$SEP\_EMISpath/marine/inln\_mole\_marine\_20160101.ncf  
setenv STK\_EMIS\_014 \$SEP\_EMISpath/nonroad\_diesel/inln\_mole\_nonroad\_diesel\_20160101.ncf  
setenv STK\_EMIS\_015 \$SEP\_EMISpath/nonroad\_gas/inln\_mole\_nonroad\_gas\_20160101.ncf  
setenv STK\_EMIS\_016 \$SEP\_EMISpath/other/inln\_mole\_other\_20160101.ncf  
580 setenv STK\_EMIS\_017 \$SEP\_EMISpath/rail/inln\_mole\_rail\_20160101.ncf  
setenv STK\_EMIS\_018 \$SEP\_EMISpath/rxfire/inln\_mole\_rxfire\_20160101.ncf  
setenv STK\_EMIS\_019 \$SEP\_EMISpath/wildfire/inln\_mole\_wildfire\_20160101.ncf

# Label Each Offline Point Emissions Stream

585 setenv STK\_EMIS\_LAB\_001 EP\_AIRCRAFT  
setenv STK\_EMIS\_LAB\_002 EP\_DUST  
setenv STK\_EMIS\_LAB\_003 EP\_EGU\_BIOMASS  
setenv STK\_EMIS\_LAB\_004 EP\_EGU\_COAL  
setenv STK\_EMIS\_LAB\_005 EP\_EGU\_NATGAS  
590 setenv STK\_EMIS\_LAB\_006 EP\_EGU\_OIL  
setenv STK\_EMIS\_LAB\_007 EP\_INDUS\_BIOMASS  
setenv STK\_EMIS\_LAB\_008 EP\_INDUS\_COAL  
setenv STK\_EMIS\_LAB\_009 EP\_INDUS\_GASOLINE  
setenv STK\_EMIS\_LAB\_010 EP\_INDUS\_NATGAS  
595 setenv STK\_EMIS\_LAB\_011 EP\_INDUS\_OIL  
setenv STK\_EMIS\_LAB\_012 EP\_INDUS\_WOOD  
setenv STK\_EMIS\_LAB\_013 EP\_MARINE  
setenv STK\_EMIS\_LAB\_014 EP\_NONROAD\_DIESEL  
setenv STK\_EMIS\_LAB\_015 EP\_NONROAD\_GAS  
600 setenv STK\_EMIS\_LAB\_016 EP\_OTHER  
setenv STK\_EMIS\_LAB\_017 EP\_RAIL  
setenv STK\_EMIS\_LAB\_018 EP\_RXFIRE  
setenv STK\_EMIS\_LAB\_019 EP\_WILDFIRE



605 Table S1. Examples of streams used for conventional and high-source-resolution cases.

| Conventional Stream Label | Description                                                | High Resolution Stream Label | Description                                        |
|---------------------------|------------------------------------------------------------|------------------------------|----------------------------------------------------|
| <i>Gridded</i>            |                                                            |                              |                                                    |
| GRIDDED_EMIS              | All 2D gridded emissions merged except residential burning | GR_AGFIRE                    | Agricultural fires                                 |
| GR_RES_FIRES              | Residential wood burning                                   | GR_AGRICULTURE               | Agricultural processes (mainly ammonia)            |
|                           |                                                            | GR_AIRCRAFT                  | Airport support processes                          |
|                           |                                                            | GR_COOKING                   | Cooking                                            |
|                           |                                                            | GR_DUST                      | Fugitive, road, agricultural and construction dust |
|                           |                                                            | GR_EGU_BIOMASS               | Biomass-fueled electric generation units           |
|                           |                                                            | GR_EGU_COAL                  | Coal-fueled electric generation units              |
|                           |                                                            | GR_EGU_NATGAS                | Natural gas-fueled electric generation units       |
|                           |                                                            | GR_EGU_OIL                   | Oil-fueled electric generation units               |
|                           |                                                            | GR_INDUS_BIOMASS             | Biomass-fueled industrial emissions                |
|                           |                                                            | GR_INDUS_COAL                | Coal-fueled industrial emissions                   |
|                           |                                                            | GR_INDUS_GASOLINE            | Gasoline-fueled industrial emissions               |
|                           |                                                            | GR_INDUS_NATGAS              | Natural gas-fueled industrial emissions            |
|                           |                                                            | GR_INDUS_OIL                 | Oil-fueled industrial emissions                    |
|                           |                                                            | GR_INDUS_WOOD                | Wood-fueled industrial emissions                   |
|                           |                                                            | GR_MARINE                    | Ports and ships in domestic waters                 |
|                           |                                                            | GR_NONROAD_DIESEL            | Nonroad mobile diesel                              |
|                           |                                                            | GR_NONROAD_GAS               | Nonroad mobile gasoline                            |
|                           |                                                            | GR_ONROAD_DIESEL             | Onroad diesel                                      |
|                           |                                                            | GR_ONROAD_GAS                | Onroad gas                                         |
|                           |                                                            | GR_OTHER                     | Other                                              |
|                           |                                                            | GR_RAIL                      | Rail                                               |
|                           |                                                            | GR_RES_DIESEL                | Residential diesel burning                         |
|                           |                                                            | GR_RES_OPENFIRE              | Residential open fires                             |
|                           |                                                            | GR_RES_WOOD                  | Residential wood stoves                            |
|                           |                                                            | GR_RXFIRE                    | Prescribed Fires                                   |
|                           |                                                            | GR_WILDFIRE                  | Wildfires                                          |
| <i>Point</i>              |                                                            |                              |                                                    |
| PT_EGU                    | Electric generating units                                  | EP_AIRCRAFT                  | Aircraft landing and takeoff                       |
| PT_NONEGU                 | Non electric-generating industry                           | EP_DUST                      | Fugitive, agricultural and construction dust       |
| PT_OILGAS                 | Oil and gas industry relevant                              | EP_EGU_BIOMASS               | Biomass-fueled electric generating units           |
| PT_CMV                    | Marine                                                     | EP_EGU_COAL                  | Coal-fueled electric generating units              |
| PT_OTHER                  | Other                                                      | EP_EGU_NATGAS                | Natural gas-fueled electric generating units       |
| PT_OTHFIRE                | Other fires                                                | EP_EGU_OIL                   | Oil-fueled electric generating units               |
| PT_FIRES                  | Wildfires                                                  | EP_INDUS_BIOMASS             | Biomass-fueled industrial processes                |
| PT_AGFIRE                 | Agricultural fires                                         | EP_INDUS_COAL                | Coal-fueled industrial processes                   |
|                           |                                                            | EP_INDUS_GASOLINE            | Gasoline-fueled industrial processes               |
|                           |                                                            | EP_INDUS_NATGAS              | Natural gas-fueled industrial processes            |
|                           |                                                            | EP_INDUS_OIL                 | Oil-fueled industrial processes                    |
|                           |                                                            | EP_INDUS_WOOD                | Wood-fueled industrial processes                   |
|                           |                                                            | EP_MARINE                    | International shipping                             |
|                           |                                                            | EP_NONROAD_DIESEL            | Nonroad mobile diesel                              |
|                           |                                                            | EP_NONROAD_GAS               | Nonroad mobile gasoline                            |
|                           |                                                            | EP_OTHER                     | Other                                              |
|                           |                                                            | EP_RAIL                      | Rail                                               |
|                           |                                                            | EP_RXFIRE                    | Prescribed fires                                   |
|                           |                                                            | EP_WILDFIRE                  | Wildfires                                          |

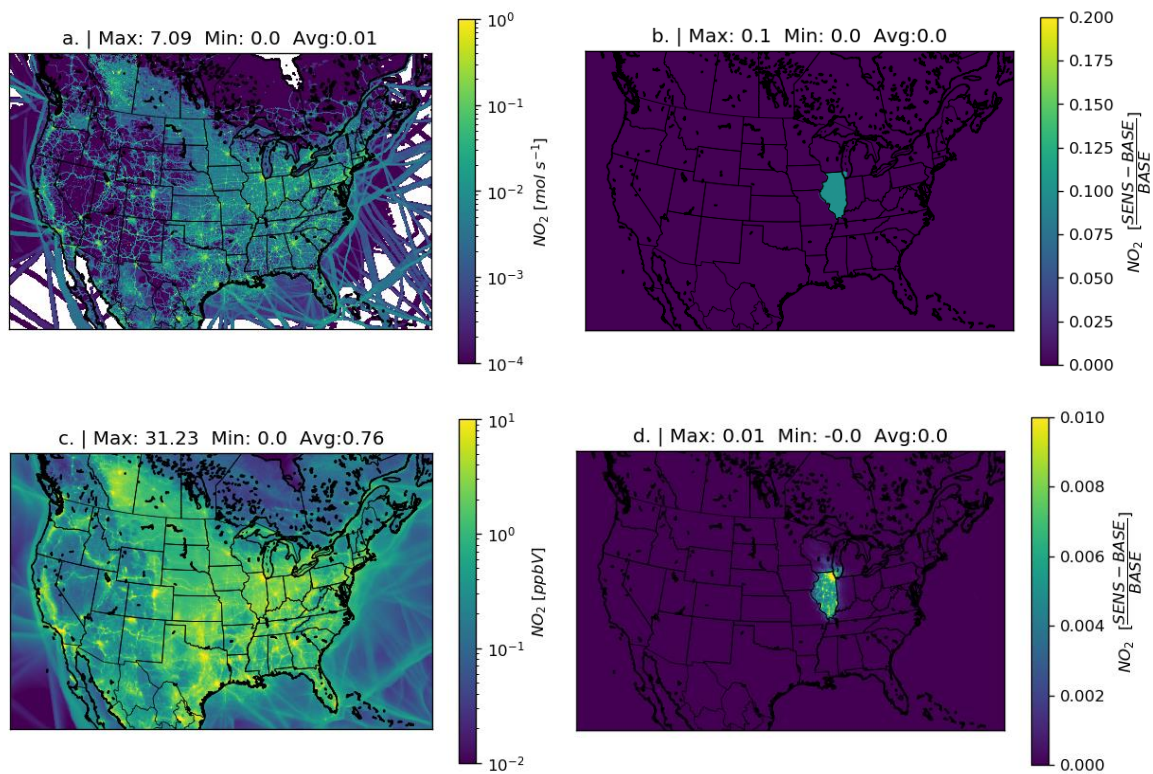

610 Figure S1. a) Average 1-hr  $\text{NO}_2$  emissions input for June 3-10, 2016. b) Change in 1-hr  $\text{NO}_2$  emissions for CMAQ run with ECI shown in section S2. c) Average  $\text{NO}_2$  surface concentrations predicted by CMAQ for June 3-10, 2016. d) Change in average  $\text{NO}_2$  concentration for ECI shown in section S2.

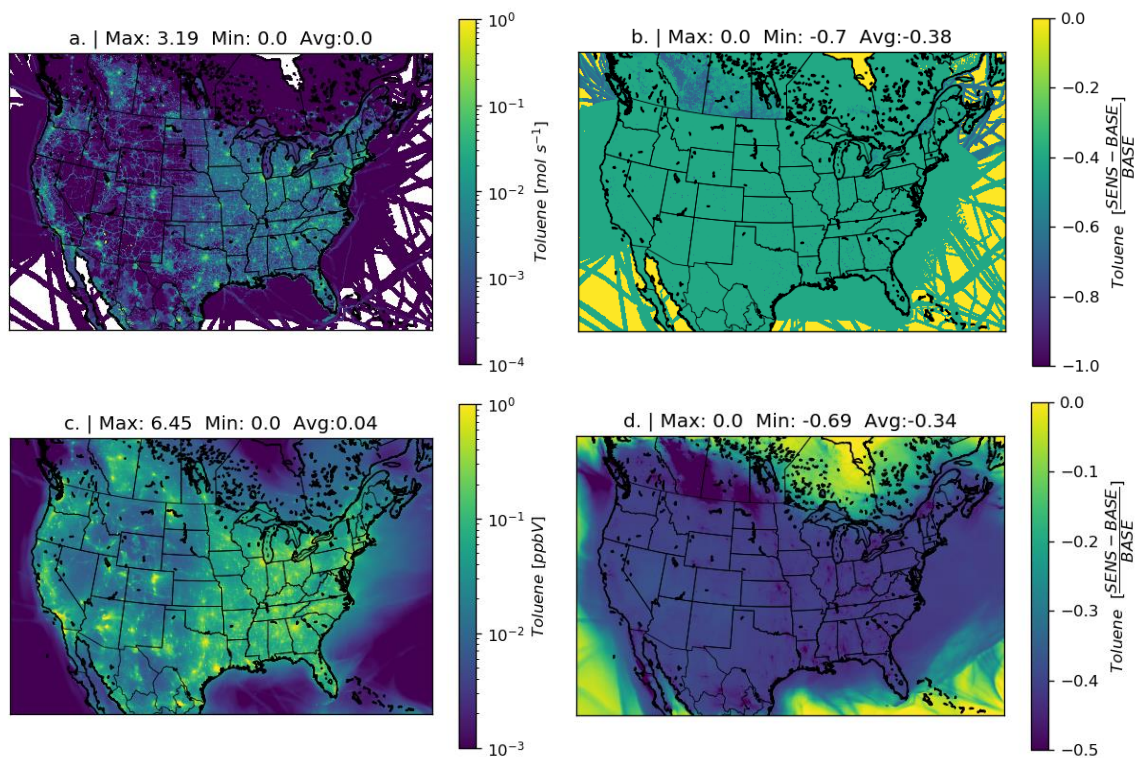

620 Figure S2. a) Average 1-hr TOL emissions input for June 3-10, 2016. b) Change in 1-hr TOL emissions for CMAQ run with ECI shown in section S3. c) Average TOL surface concentrations predicted by CMAQ for June 3-10, 2016. d) Change in average TOL concentration for ECI shown in section S3.

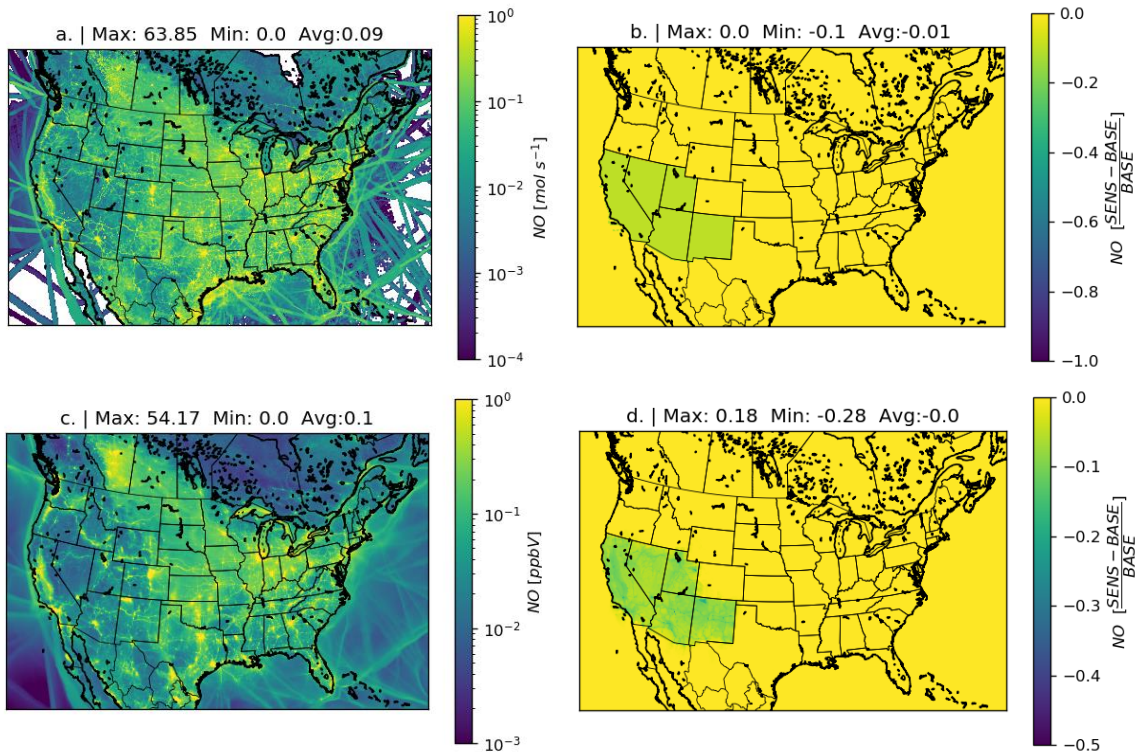

630 Figure S3. a) Average 1-hr NO emissions input for June 3-10, 2016. b) Change in 1-hr NO emissions for CMAQ run with ECI shown in section S3. c) Average NO surface concentrations predicted by CMAQ for June 3-10, 2016. d) Change in average NO concentration for ECI shown in section S3.
